# Supplementary material for: Synthesis, optical properties and biological imaging of the rare earth complexes with curcumin and pyridine
Source: Royal Society of Chemistry journal article supplement (doi:10.1039/c2jm34117d), 2012-01-01

## Supporting Information

### **Synthesis, antitumor, optical properties and biological imaging of the rare earth complexes with curcumin and pyridine**

**Shuang-Sheng Zhou<sup>\*a</sup>, Jia-Feng Wang<sup>a</sup>, Xuan Xue<sup>a</sup>, Yi Dong<sup>a</sup> Bo Jiang<sup>a</sup>, Don  
Wei<sup>a</sup>, Yong Jia<sup>ab</sup>, Jin-Huai Liu<sup>b</sup>**

*<sup>a</sup>Anhui Engineering Research Center of Modernized Chinese Medicine, Department  
of Pharmacy, Anhui University of Traditional Chinese Medicine, Hefei 230031, PR  
China*

*<sup>b</sup>Key Laboratory of Biomimetic Sensing and Advanced Robot Technology, Hefei  
Institute of Intelligent Machines, Chinese Academy of Sciences, Hefei 230031, PR  
China;*

Fax: (+86) 0551-5169291, E-mail: [zshuangsheng@126.com](mailto:zshuangsheng@126.com)

#### 1. Spectrometric characterization

- 1.1 FT-IR spectra of HCUR, La(III) complex and Eu(III) complex ..... Fig. S1
- 1.2 <sup>1</sup>H NMR spectra of HCUR, La(III) complex and Eu(III) complex ..... Fig. S2
- 1.3 MS spectra of HCUR, La(III) complex and Eu(III) complex ..... Fig. S3
- 2 TG analysis of La(III) complex(a) and Eu(III) complex(b) ..... Fig. S4
- 3 The cytotoxicity of HCUR, La(III) complex and Eu(III) complex ..... Fig. S5

## 1. Spectrometric characterization

**Fig. S1** FT-IR spectra of HCUR, La(III) complex and Eu(III) complex

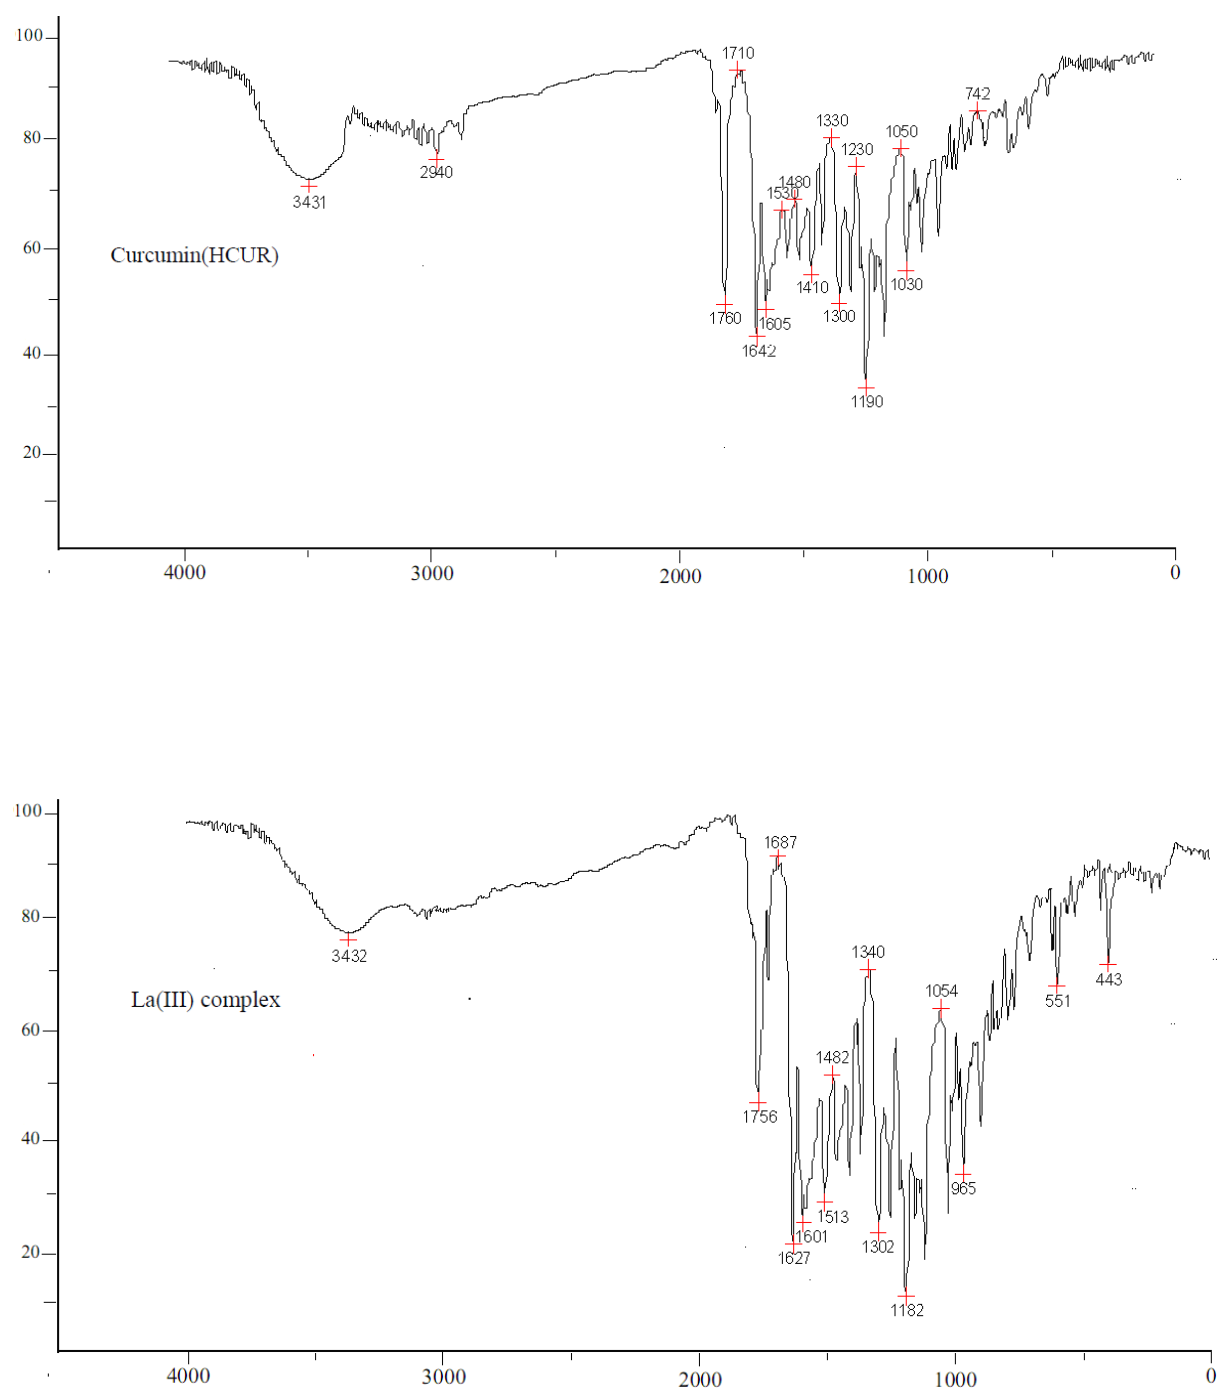

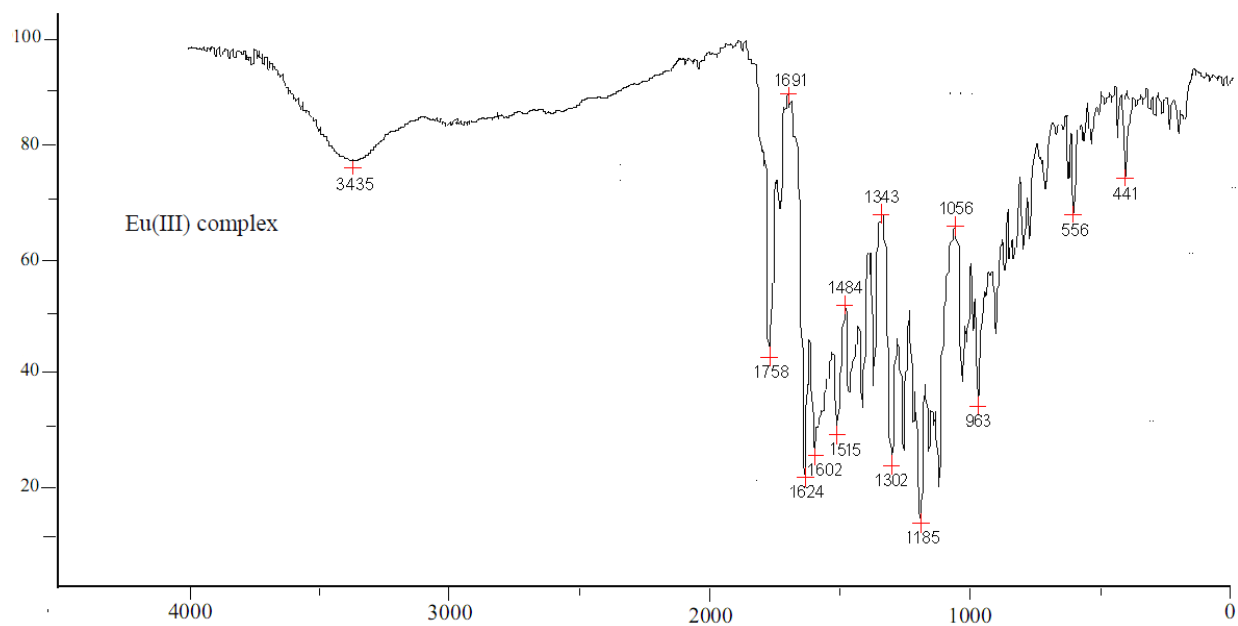

**Fig. S2** <sup>1</sup>H NMR spectra of HCUR, La(III) complex and Eu(III) complex

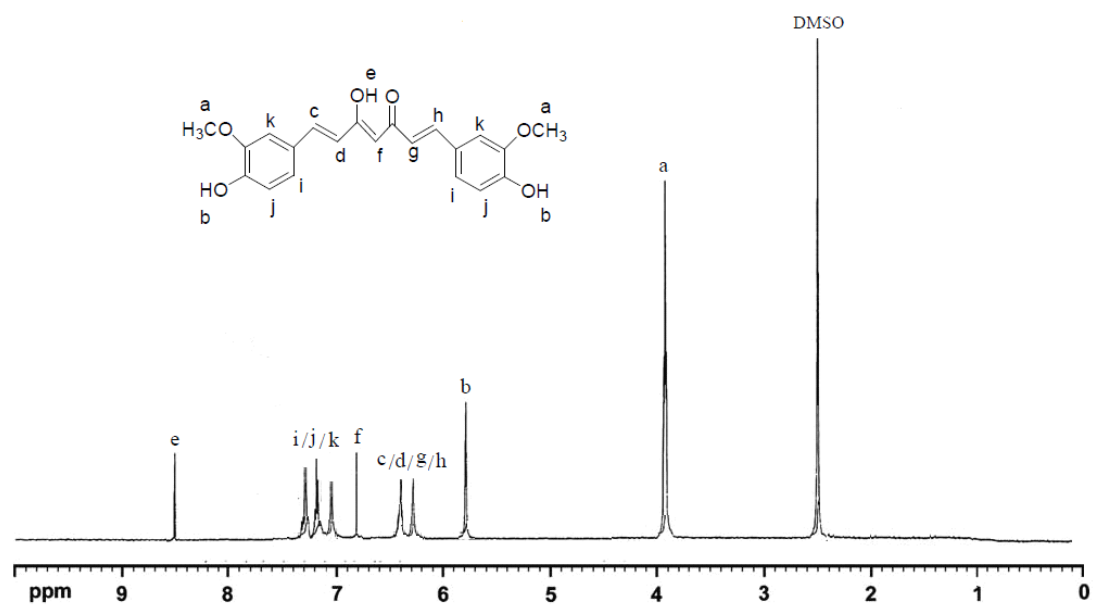

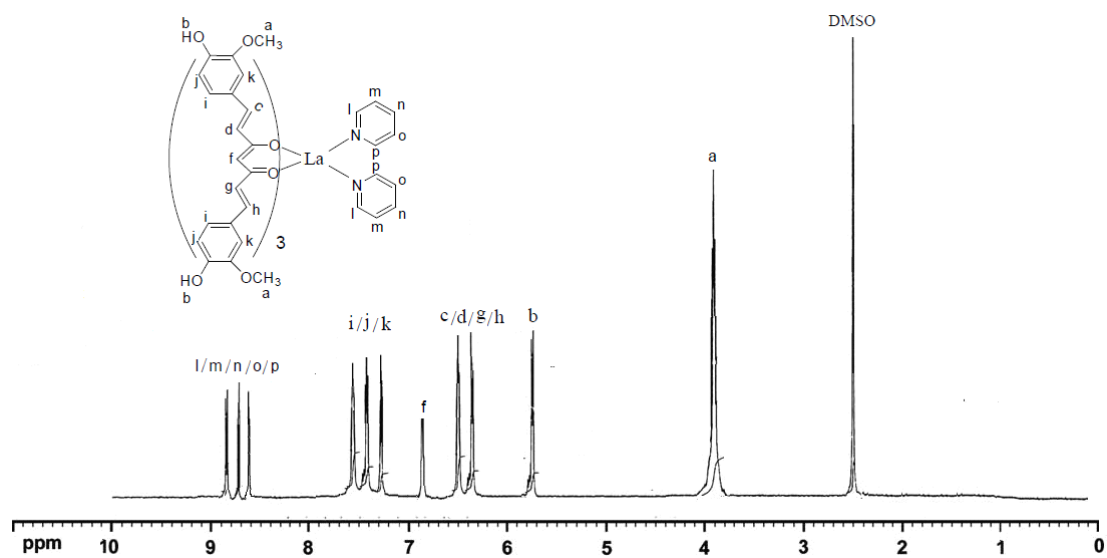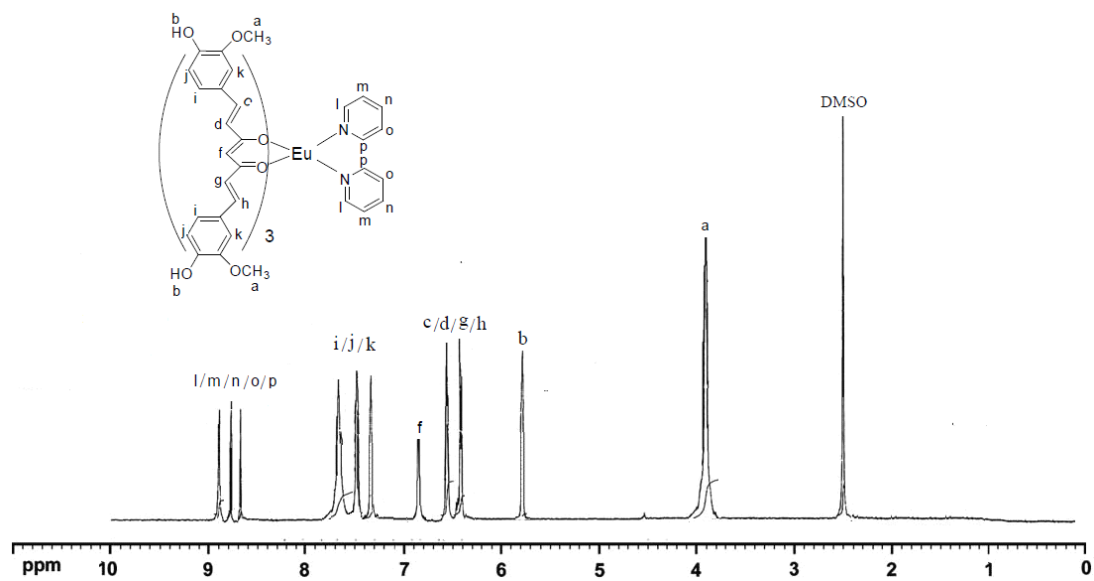

**Fig. S3** MS spectra of HCUR, La(III) complex and Eu(III) complex

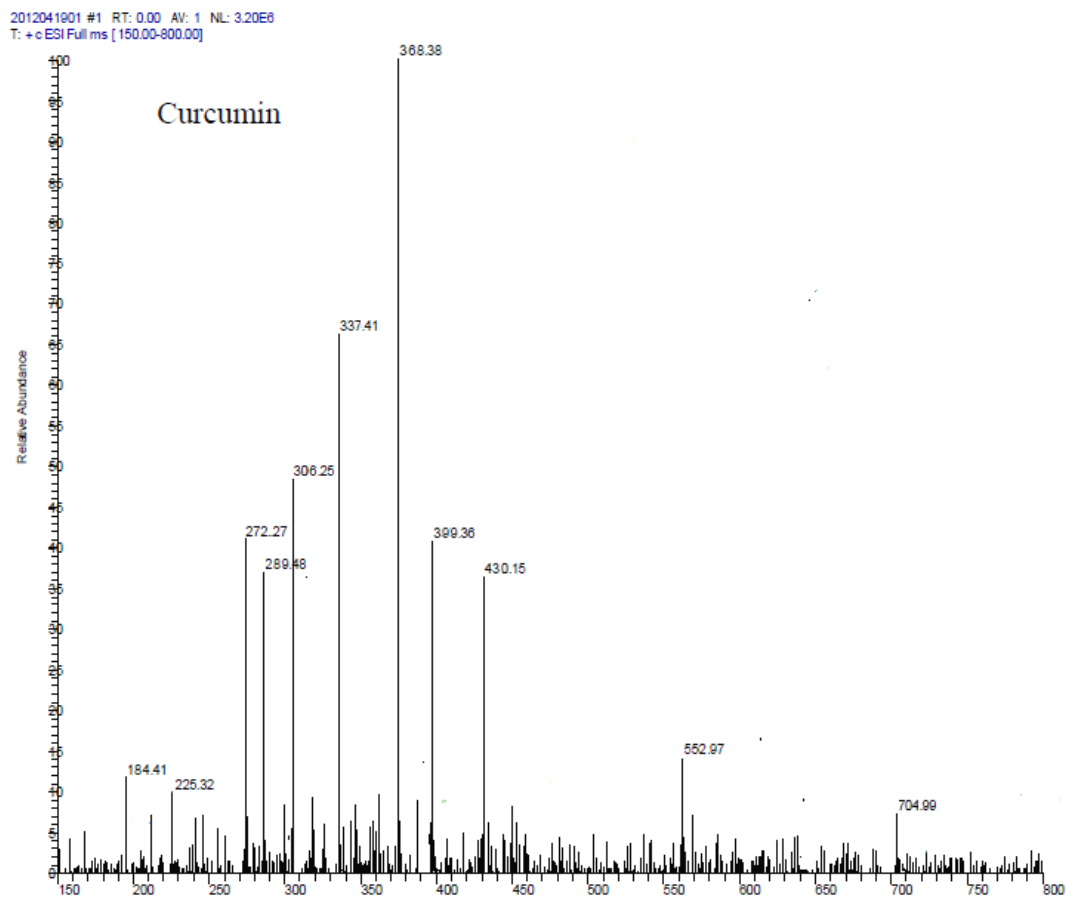

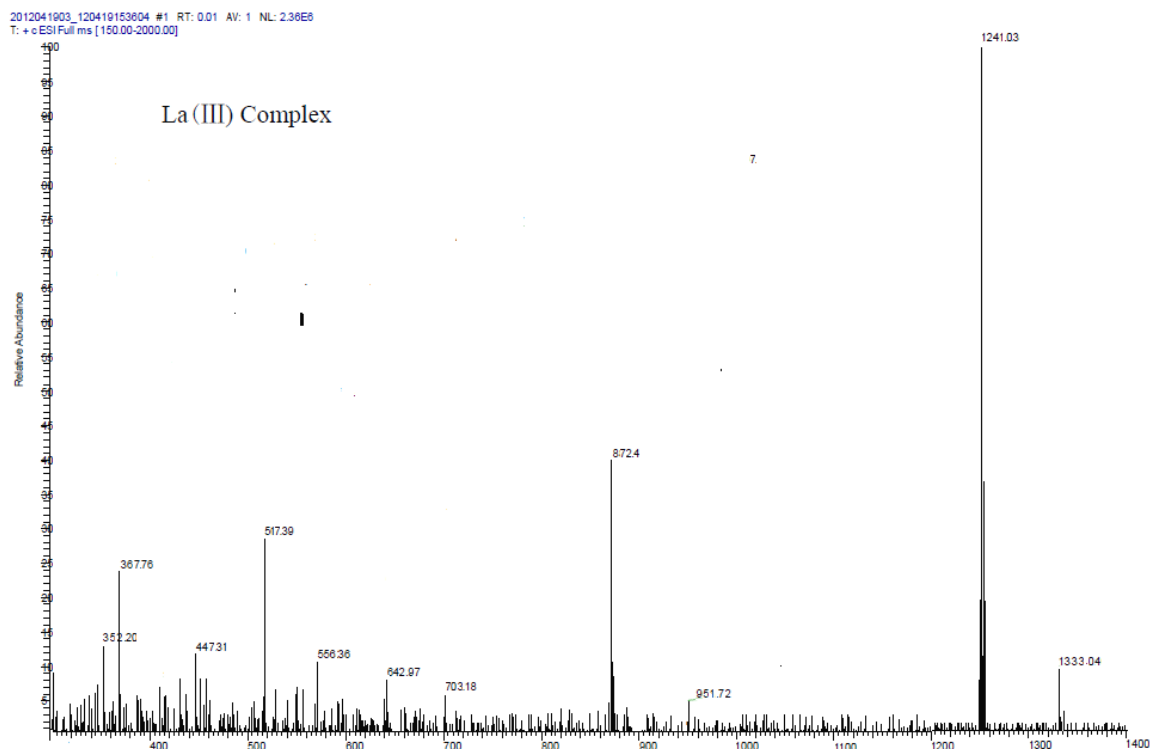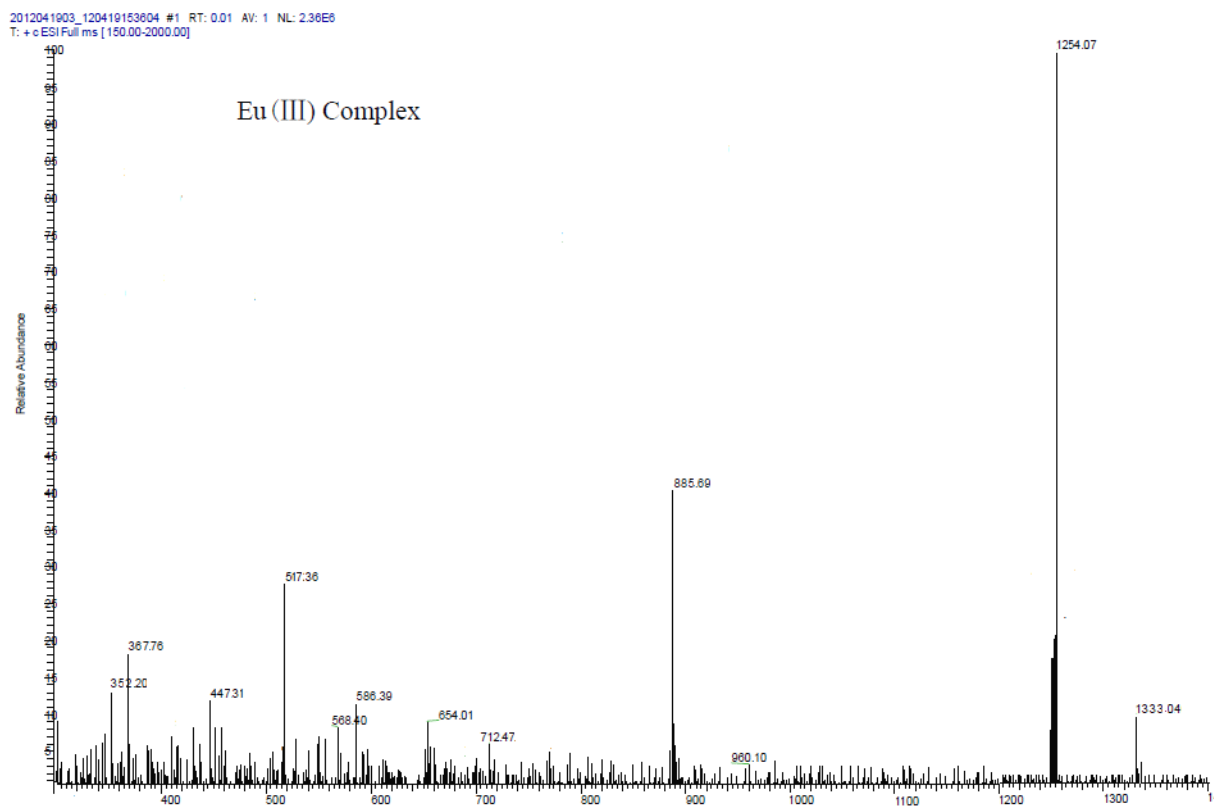

**Fig. S4** TG analysis of La(III) complex(a) and Eu(III) complex(b)

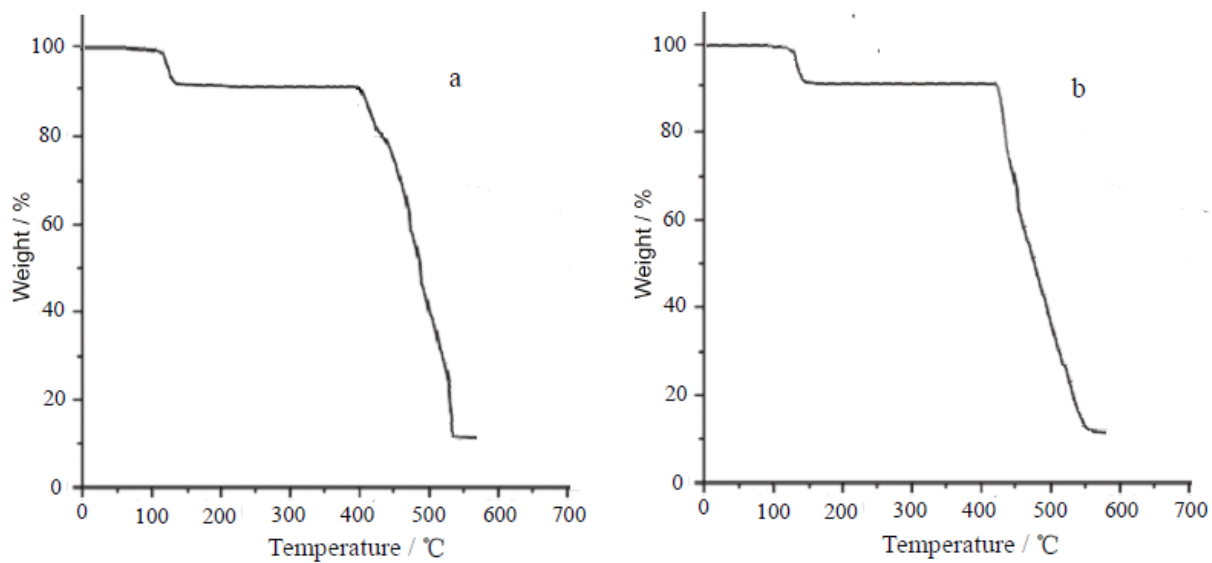

**Fig. S5** The cytotoxicity of HCUR, Eu(III) complex and La(III) complex

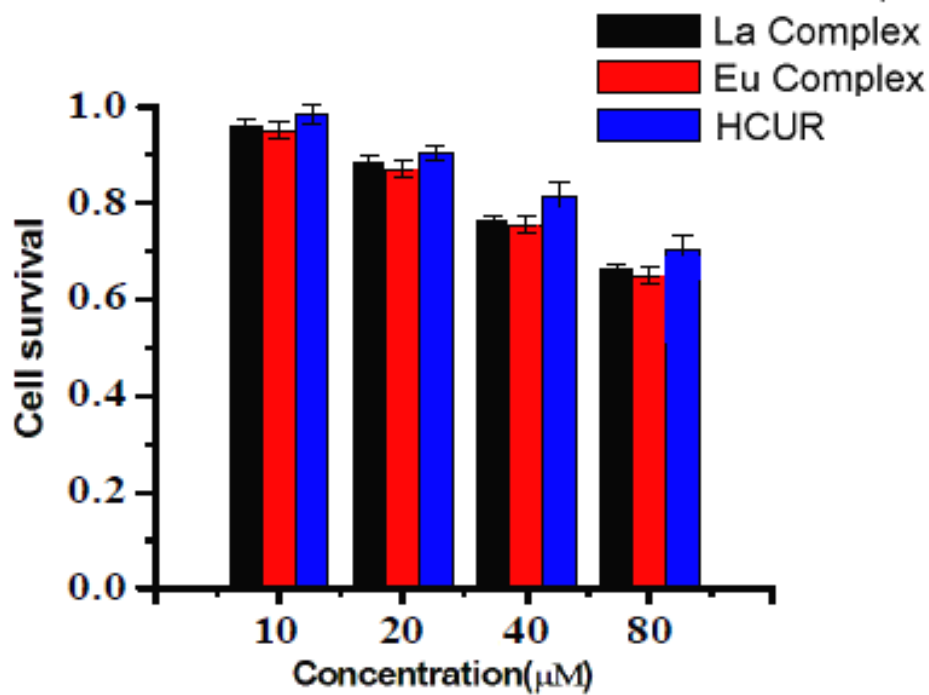

Supplement: c2jm34117d.pdf [file c2jm34117d.pdf]
